# Supplementary material for: Non-Specific Epileptic Activity, EEG, and Brain Imaging in Loss of Function Variants in SATB1: A New Case Report and Review of the Literature
Source: MDPI journal article supplement (doi:10.3390/genes15050548), 2024-04-25
Supplement: s1 [file s1]

**Supplementary, Table S1. WES results emerged from the family trio. Variants all refer to the Human Genome Assembly GRCh37/hg19, and they are all described in a heterozygous status.**

| Gene            | Transcript      | HGVS_coding (protein)        | Inheritance    | Allele frequency | ACMG Classification <sup>7</sup> |
|-----------------|-----------------|------------------------------|----------------|------------------|----------------------------------|
| <i>SATB1</i>    | NM_002971.6     | c.1818delG(p.(Gln606fs*101)) | <i>de novo</i> | 0%               | Likely                           |
|                 | ENST00000417717 |                              |                |                  | Pathogenic                       |
| <i>SRCAP</i>    | NM_006662.3     | c.3640A>T(p.(Asn1214Tyr))    | paternally     | 0.000795%        | VUS                              |
|                 | ENST00000262518 |                              |                |                  |                                  |
| <i>CACNA1A</i>  | NM_001127222.2  | c.6125C>T(p.(Thr2042Met))    | maternally     | 0.003678%        | VUS                              |
|                 | ENST00000360228 |                              |                |                  |                                  |
| <i>PAFAH1B1</i> | NM_000430.4     | c.1186G>A(p.(Val396Ile))     | paternally     | 0.001415%        | VUS                              |
|                 | ENST00000397195 |                              |                |                  |                                  |
| <i>DCX</i>      | NM_000555.3     | c.151A>G(p.(Met51Val))       | paternally     | 0.024542%        | Benign                           |
|                 | ENST00000338081 |                              |                |                  |                                  |

VUS: Variants of Uncertain Significance. Metrics such as Combining Annotation-Dependent Deletion (CADD-Phred) for scoring the deleteriousness of variants (>20), Rare Exome Variant Ensemble Learner (REVEL) to distinguish pathogenic from rare neutral variants with allele frequencies <0.5% (<0.2: benign, >0.5: damaging), and MoBiDiC Prioritization Algorithm (MPA: raw score 1-10; 10: high impact) were considered to choose variants of clinical interest.
